# Supplementary material for: STYXL1 regulates CCT complex assembly and flagellar tubulin folding in sperm formation
Source: Springer Nature journal article supplement (doi:10.1038/s41467-023-44337-1), 2024-01-02
Supplement: MOESM1 [file 41467_2023_44337_MOESM1_ESM.pdf]

## **STYXL1 regulates CCT complex assembly and flagellar tubulin folding in sperm formation**

Yu Chen<sup>1, 3, #</sup>, Mengjiao Luo<sup>1, #</sup>, Haixia Tu<sup>1, 2, #</sup>, Yaling Qi<sup>1, #</sup>, Yueshuai Guo<sup>1</sup>, Xiangzheng Zhang<sup>1</sup>, Yiqiang Cui<sup>1</sup>, Mengmeng Gao<sup>1</sup>, Xin Zhou<sup>1</sup>, Tianyu Zhu<sup>1</sup>, Hui Zhu<sup>1</sup>, Chenghao Situ<sup>1,\*</sup>, Yan Li<sup>2,\*</sup>, Xuejiang Guo<sup>1,\*</sup>

<sup>1</sup> Department of Histology and Embryology, State Key Laboratory of Reproductive Medicine and Offspring Health, Nanjing Medical University, Nanjing, 211166, China.

<sup>2</sup> Department of Clinical Laboratory, Sir Run Run Hospital, Nanjing Medical University, Nanjing, 211166, China.

<sup>3</sup> Medical Research Center, Changzhou Maternal and Child Health Care Hospital, Changzhou Medical Center, Nanjing Medical University, Changzhou, 213000, China.

# Equal contribution

\* To whom correspondence should be addressed. Tel: +86-25-86869383; Fax: +86-25-86869383; Email: guo\_xuejiang@njmu.edu.cn (X.G.), yanli@njmu.edu.cn (Y.L.), situchenghao@njmu.edu.cn (C.S.)

## **Supplementary information**

**Supplementary Fig. 1** Sequence conservation and expression analysis of STYXL1.

**Supplementary Fig. 2** The phenotype analysis of *Styx11* <sup>$\Delta 4bp/\Delta 4bp$</sup>  male mice.

**Supplementary Fig. 3** Immunofluorescence analysis of spermiogenesis after deletion of *Styx11*.

**Supplementary Fig. 4** Quantitative proteomic analysis of *Styx11*<sup>-/-</sup> sperm.

**Supplementary Fig. 5** GST pull down assay of GST-fused mouse STYXL1 protein.

**Supplementary Fig. 6** Extracted ion chromatograms from protein quantification measurements by PRM.

**Supplementary Table 1.** Antibodies used in this study.

**Supplementary Table 2.** Primers used in qRT-PCR.

**Supplementary Table 3.** Heavy peptide sequences used in PRM quantification.

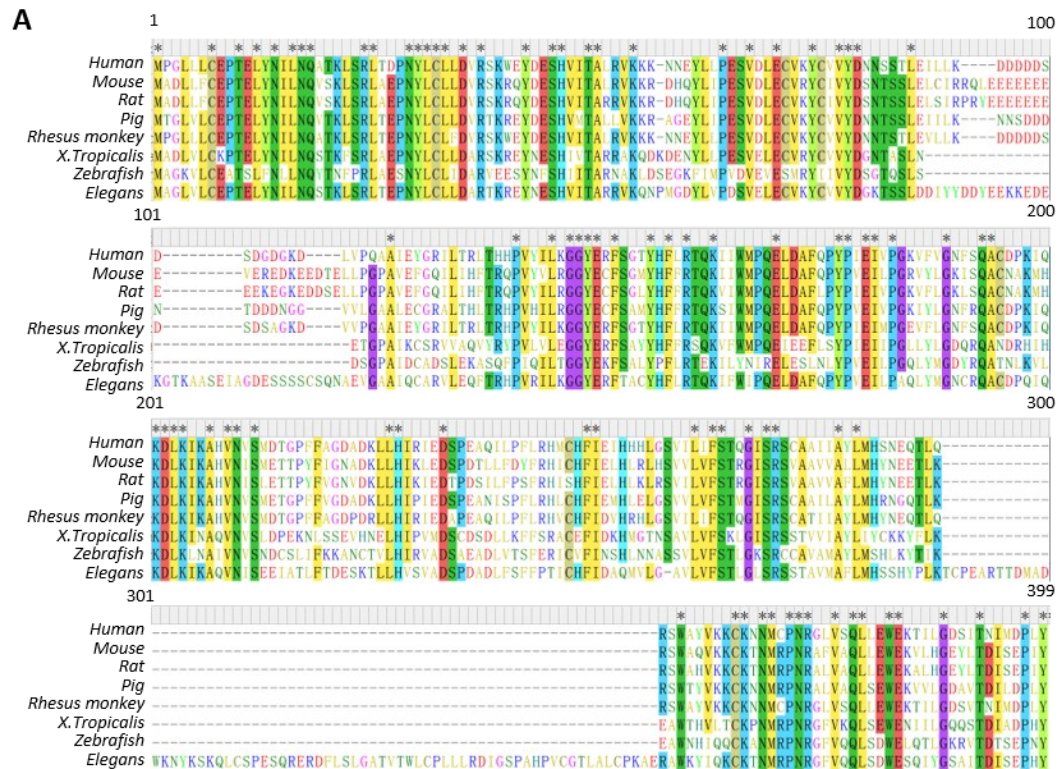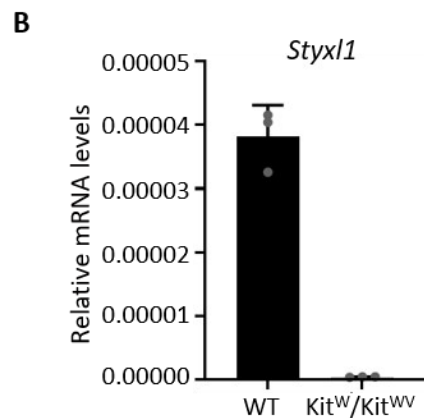

**Supplementary Fig.1 Sequence conservation and expression analysis of STYXL1.**

(A) Multiple sequence alignment of STYXL1 proteins from different species. (B) *Styx11* mRNA expression levels quantified in adult WT and Kit<sup>W</sup>/Kit<sup>WV</sup> testes by qRT-PCR ( $n=3$  mice per group). Data are presented with the mean  $\pm$  SD. Source data are provided as a Source Data file.

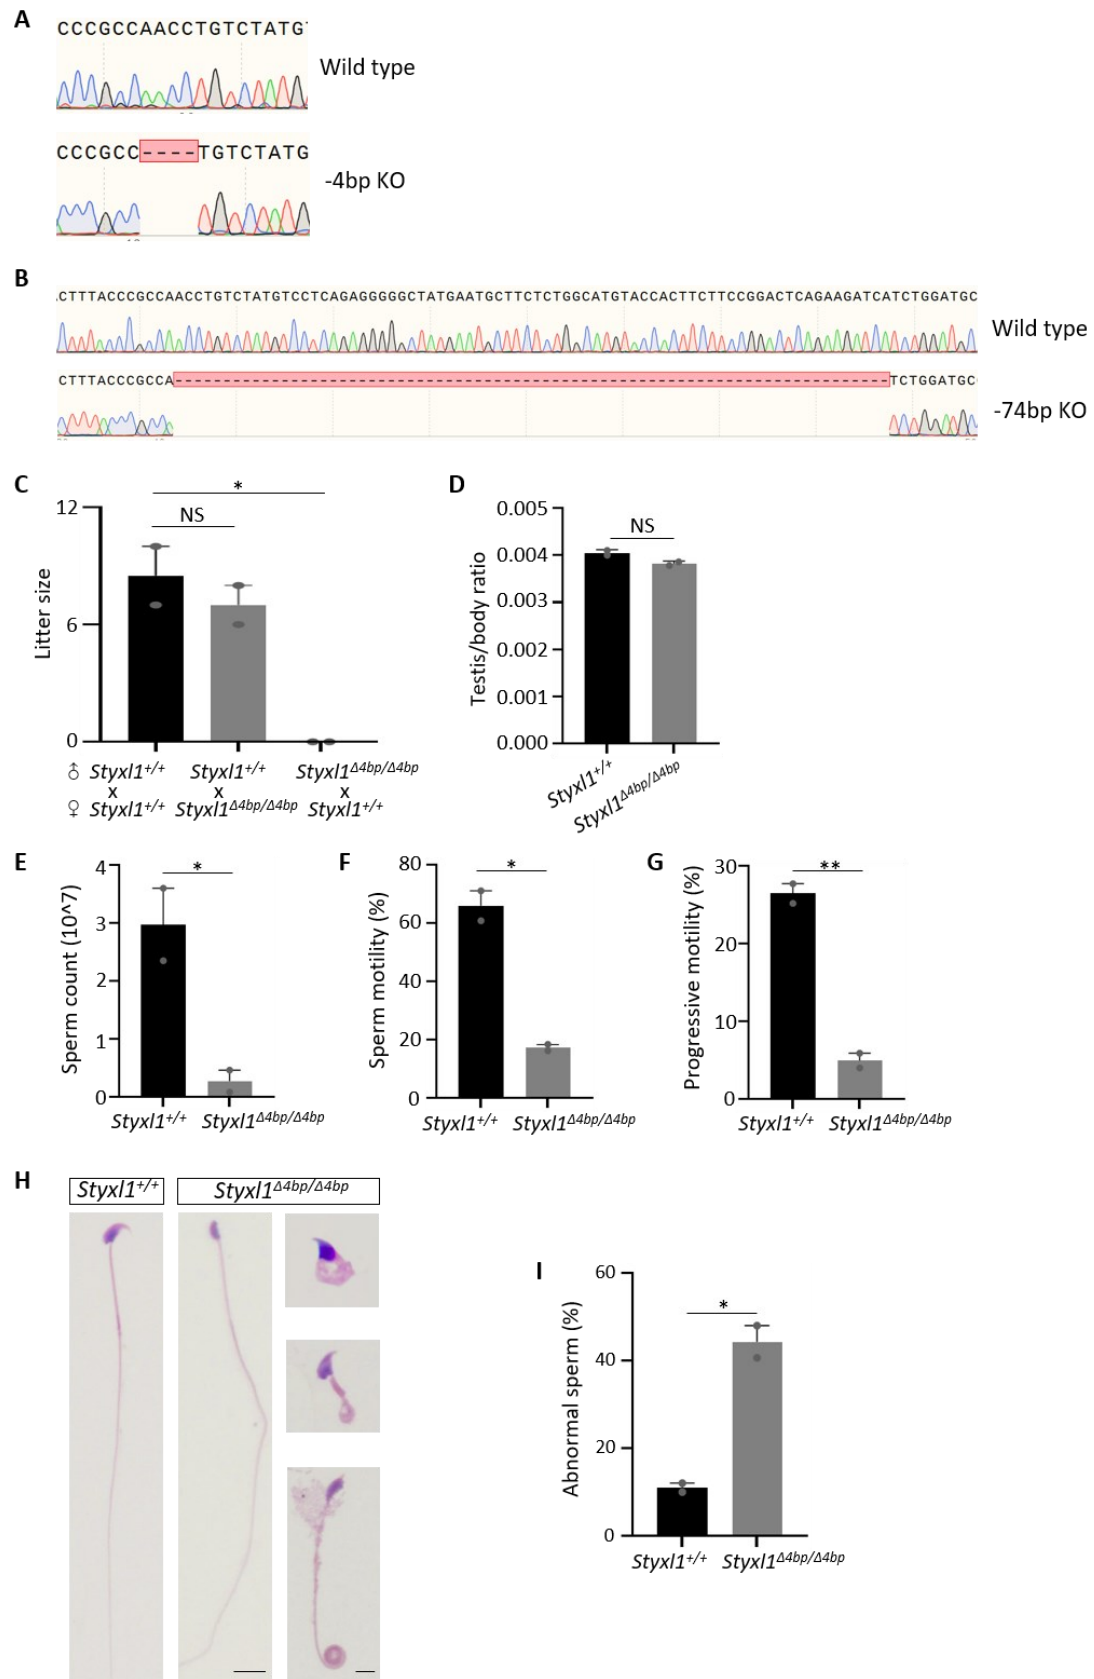

**Supplementary Fig. 2 The phenotype analysis of *Styx11*<sup>Δ4bp/Δ4bp</sup> male mice. (A-B)** Sanger sequencing showing 4 bp and 74 bp deletion in exon 5 of the *Styx11* gene. (C)

Litter size of adult *Styx11* <sup>$\Delta 4bp/\Delta 4bp$</sup>  male and *Styx11* <sup>$\Delta 4bp/\Delta 4bp$</sup>  female mice ( $n=2$  mice per group). NS  $p=0.5583$  and  $*p=0.0170$  using one-way ANOVA followed by Dunnett's multiple comparisons test. **(D)** Statistics analysis of adult *Styx11* <sup>$+/+$</sup>  and *Styx11* <sup>$\Delta 4bp/\Delta 4bp$</sup>  testis/body weight ratio ( $n=2$  mice per group). NS  $p=0.0695$  using two-tailed Student's t-test. **(E-G)** Quantitative analysis of sperm count ( $*p=0.0107$  using two-tailed Student's t-test) **(E)**, sperm motility ( $*p=0.0115$  using two-tailed Student's t-test) **(F)** and progressive motility ( $**p=0.0053$  using two-tailed Student's t-test) **(G)** of adult *Styx11* <sup>$+/+$</sup>  and *Styx11* <sup>$\Delta 4bp/\Delta 4bp$</sup>  mice ( $n=2$  mice per group). **(H-I)** The morphologies of adult *Styx11* <sup>$\Delta 4bp/\Delta 4bp$</sup>  sperm by H&E staining ( $n=3$  biologically independent samples) **(H)** and the percentage of sperm abnormalities ( $n=2$  mice per group,  $*p=0.0129$  using two-tailed Student's t-test) **(I)**. Scale bar:  $5\mu\text{m}$ . NS, not significant; \*,  $p < 0.05$ ; \*\*,  $p < 0.01$ ; \*\*\*,  $p < 0.001$ . Data are presented as the mean  $\pm$  SEM. Source data are provided as a Source Data file.

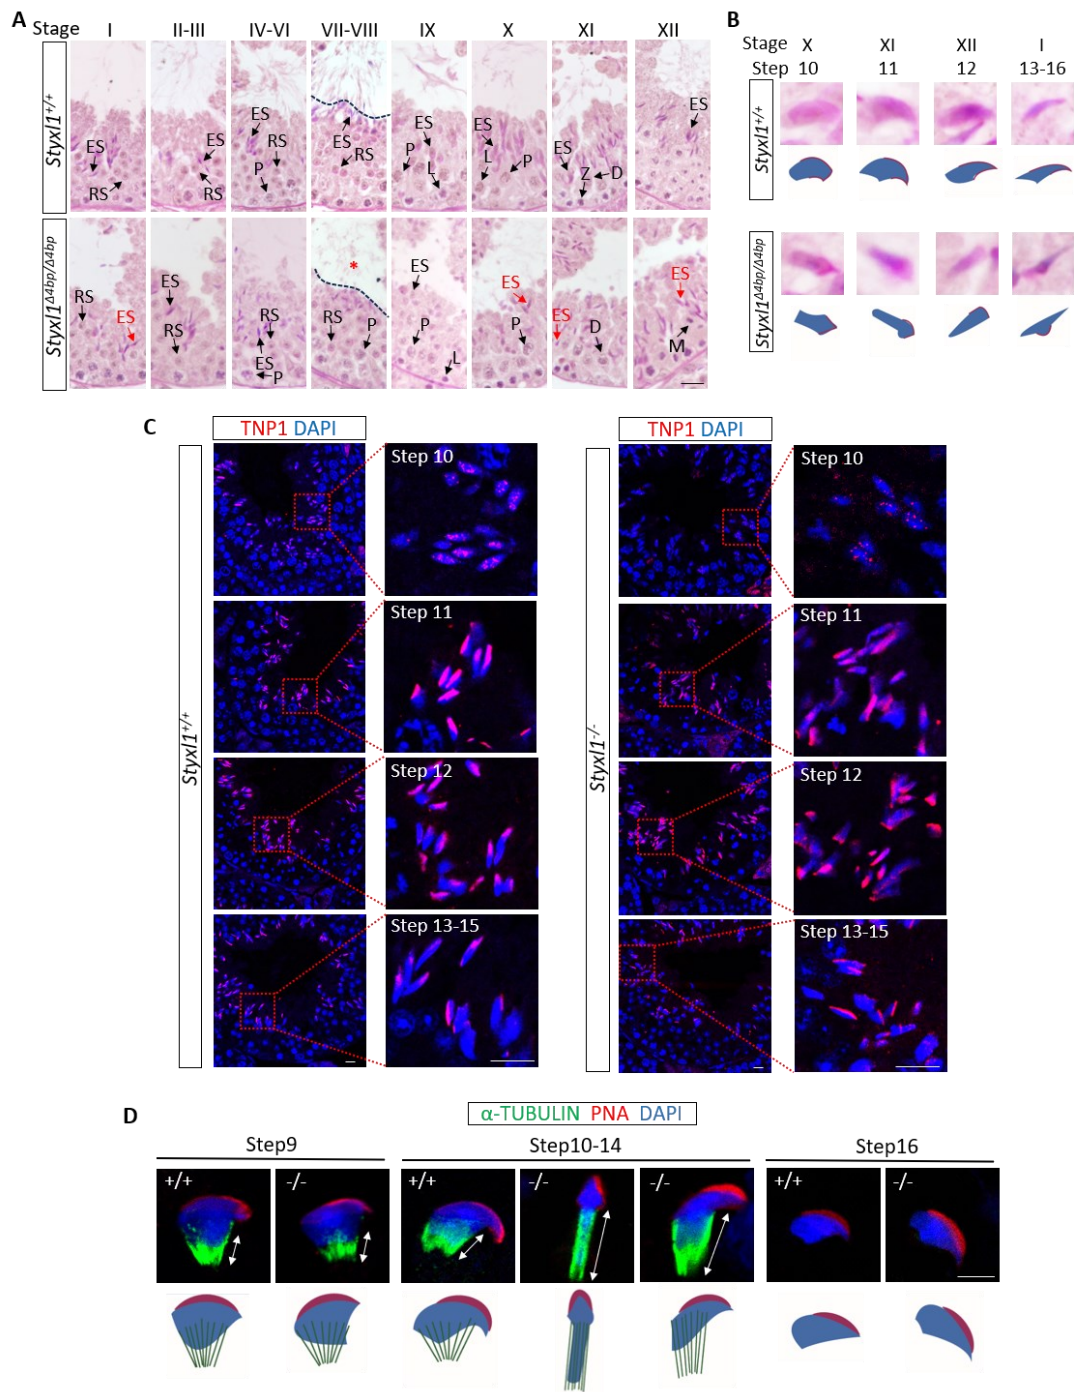

**Supplementary Fig. 3 Immunofluorescence analysis of spermiogenesis after deletion of *Styx11*.** (A) Different stages of seminiferous tubules in PAS-stained adult *Styx11*<sup>+/+</sup> and *Styx11*<sup>Δ4bp/Δ4bp</sup> testes. The red arrow indicates abnormal nuclei of elongating spermatids. Asterisk indicates defects of sperm tails. L, leptotene; Z, zygotene; P, pachytene; D, diplotene; RS, round spermatid; ES, elongated spermatid. M, metaphase. Scale bar: 25μm. (B) Enlarged pictures of different steps of adult

*Styx11*<sup>+/+</sup> and *Styx11*<sup>Δ4bp/Δ4bp</sup> elongated spermatids pointed by arrows in **(A)** were presented. Schematic diagrams were denoted at bottom. **(C)** Immunofluorescence staining of TNP1 (red) in adult *Styx11*<sup>+/+</sup> and *Styx11*<sup>-/-</sup> seminiferous tubules with nuclei stained by DAPI (blue). Scale bar: 10μm. **(D)** Immunofluorescence of α-TUBULIN (green) in different steps of spermatids containing manchette from adult *Styx11*<sup>+/+</sup> and *Styx11*<sup>-/-</sup> testes with nuclei stained by DAPI (blue). Scale bar: 5μm. *n*=3 biologically independent samples were included in each group (A, C, D).

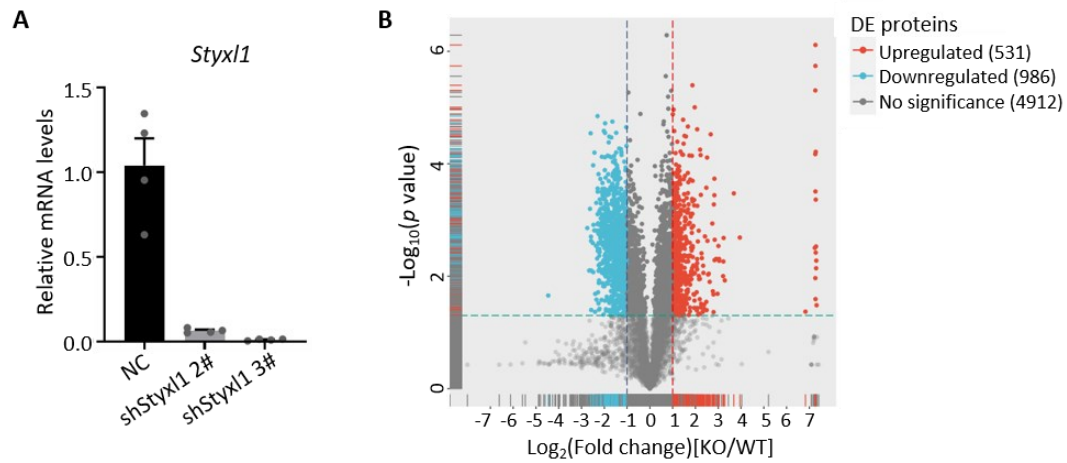

**Supplementary Fig. 4 Quantitative proteomic analysis of *Styx11*<sup>-/-</sup> sperm.** (A) The relative mRNA levels of *Styx11* in control and *Styx11* shRNA treated groups ( $n=4$  biological replicates per group). Data are presented as the mean  $\pm$  SEM. (B) The volcano plot of quantified proteins between adult *Styx11*<sup>+/+</sup> and *Styx11*<sup>-/-</sup> sperm. The cutoff values ( $p < 0.05$  and Foldchange  $> 2$ ) were utilized to identify significantly differentially expressed proteins. Source data are provided as a Source Data file.



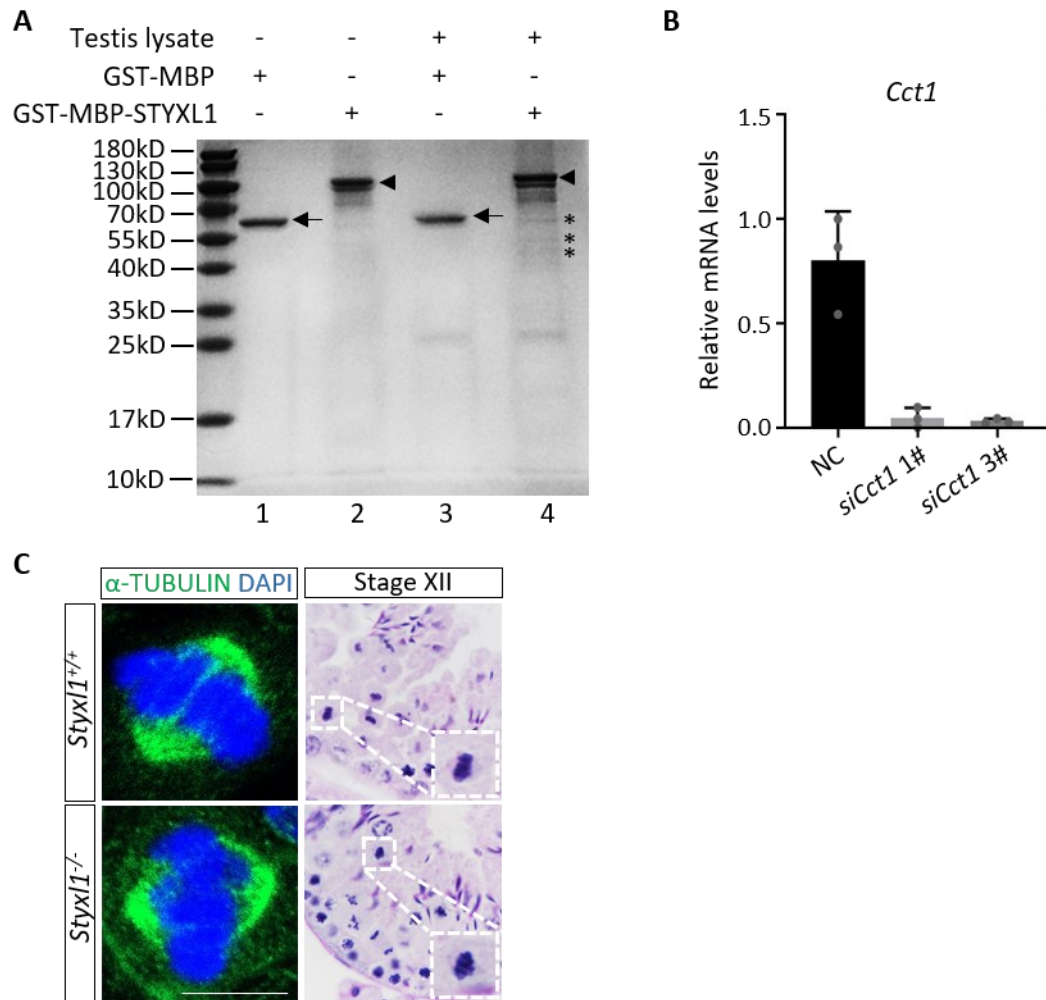

**Supplementary Fig. 5 GST pull down assay of GST-fused mouse STYXL1 protein.**

(A) SDS-PAGE analysis and Coomassie blue staining of the eluates from GST-beads.  $n=3$  biologically independent samples were included. The arrow and arrowhead indicate the bands of GST-MBP and GST-MBP-STYXL1 protein, respectively. The asterisks indicate the bands that were differentially pulled down by GST-MBP-STYXL1 beads from testis lysate compared with GST-MBP with lysate and GST-MBP-STYXL1 without lysate. (B) The relative mRNA levels of *Cct1* in control and *Cct1* siRNA treated groups ( $n=3$  biological replicates per group). Data are presented as the mean  $\pm$  SD. (C) Immunofluorescent staining of  $\alpha$ -tubulin (green) and H&E-staining of metaphase spermatocytes in adult *Styx11*<sup>+/+</sup> and *Styx11*<sup>-/-</sup> testes.  $n=3$  biologically independent samples were included. Nuclei were stained with DAPI (blue). Insets indicate zoom-in views of the boxed metaphase spermatocytes. Scale bar: 10 $\mu$ m. Source data are provided as a Source Data file.

STYXL1: QYDESHVITALR ( $^{13}\text{C}_6$ ,  $^{15}\text{N}_4$ )

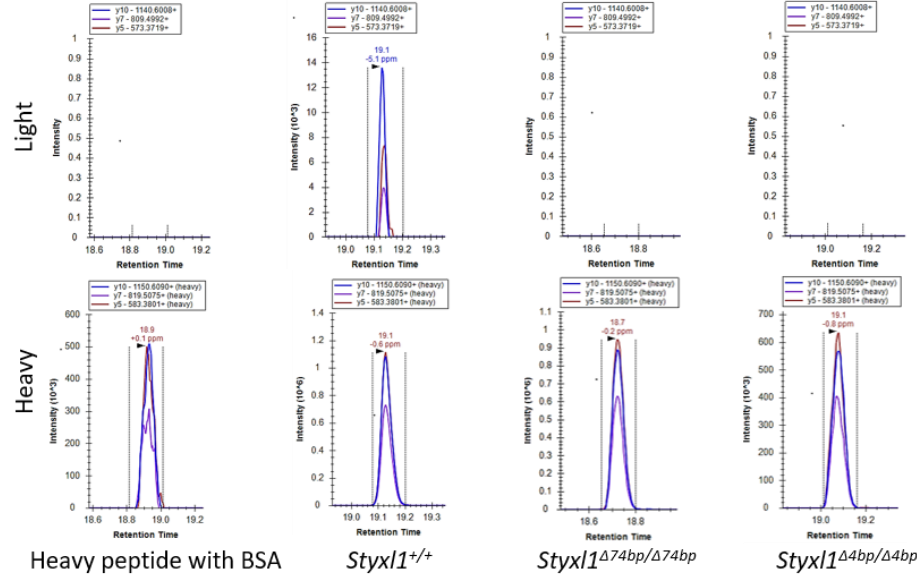

STYXL1: AFVAQLLEWEK ( $^{13}\text{C}_6$ ,  $^{15}\text{N}_2$ )

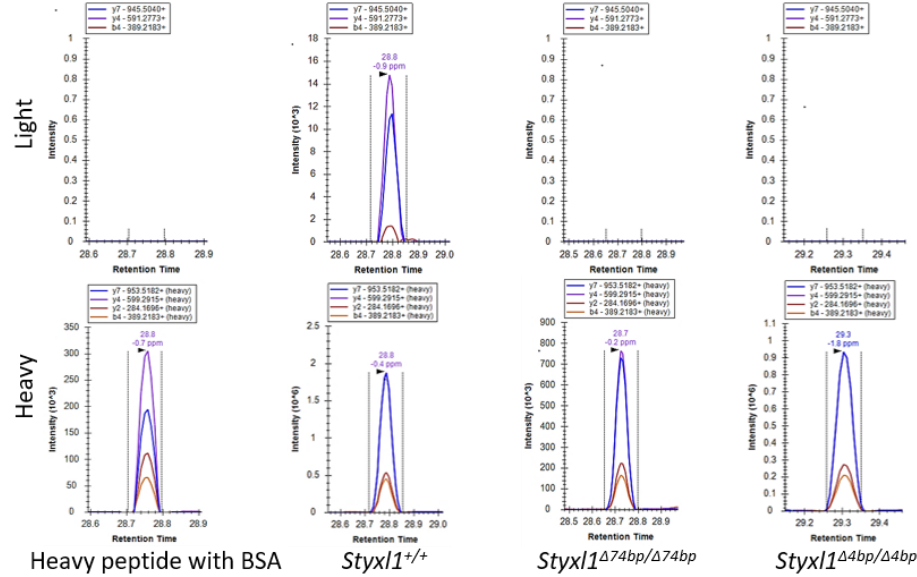

STYXL1: LAEPNYLCLLDVR ( $^{13}\text{C}_6$ ,  $^{15}\text{N}_4$ )

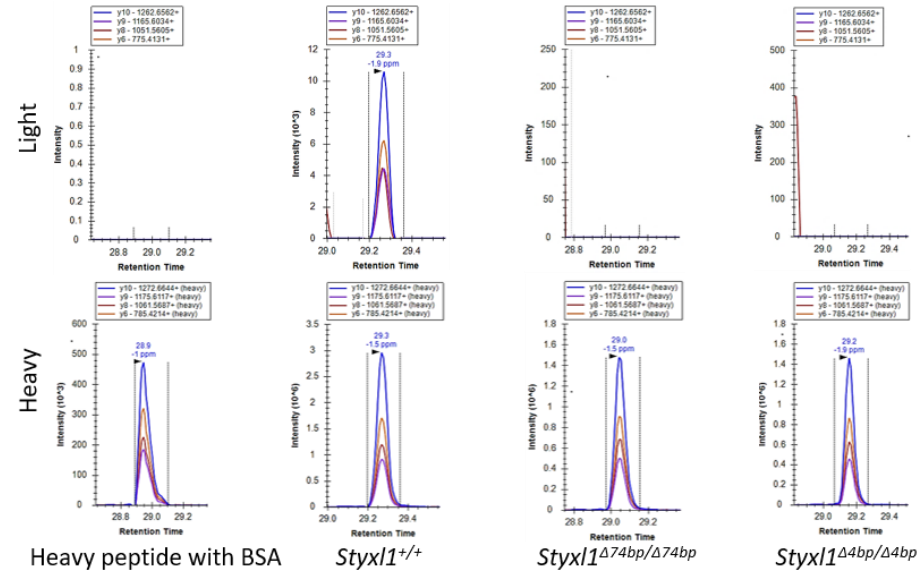

**Supplementary Fig. 6 Extracted ion chromatograms from protein quantification measurements by PRM.** Representative extracted ion chromatograms of three peptides from STYXL1 protein in quantificative measurements by PRM. Heavy peptides with BSA were used as a negative control.

**Supplementary Table 1. Antibodies used in this study.**

| <b>Antibodies</b> | <b>Brand</b> | <b>Cat No.</b> |
|-------------------|--------------|----------------|
| DDDDK-tag         | MBL          | PM020          |
| $\alpha$ -TUBULIN | Abways       | P68366         |
| TNP1              | Proteintech  | 17178-1-AP     |
| AC-TUBULIN        | Sigma        | T6793          |
| HA-tag            | Sigma        | H6908          |
| SLC2A3            | Proteintech  | 20403-1-AP     |
| AKAP4             | Proteintech  | 24986-1-AP     |
| CCT1              | Proteintech  | 10320-1-AP     |
| CCT2              | Proteintech  | 24896-1-AP     |
| CCT3              | Proteintech  | 10571-1-AP     |
| CCT4              | Proteintech  | 21524-1-AP     |
| CCT5              | Proteintech  | 11603-1-AP     |
| CCT6              | Proteintech  | 19793-1-AP     |
| CCT7              | Proteintech  | 15994-1-AP     |
| CCT8              | Proteintech  | 12263-1-AP     |
| PRM2              | Biarpatchbio | Mab-Hup2B-150  |
| $\beta$ -TUBULIN  | Abclonal     | AC021          |
| GAPDH             | Abways       | AB0036         |
| PNA               | VECTORLABS   | RL-1072        |

**Supplementary Table 2. Primers used in qRT-PCR.**

| <b>Gene</b>   | <b>Forward primer (5'-3')</b> | <b>Reverse primer (5'-3')</b> |
|---------------|-------------------------------|-------------------------------|
| <i>Styx11</i> | CTGCTTTTCTGCGAGCCAAC          | TGTCGTTTTGATCGGACATCC         |
| <i>Cct1</i>   | CCGCTCCCAGAATGTTATGG          | CGGGATGTTCTACCTCCAGT          |

**Supplementary Table 3. Heavy peptide sequences used in PRM quantification.**

| Gene Names | Heavy Peptide Sequence                                                        |
|------------|-------------------------------------------------------------------------------|
| STYXL1     | QYDESHVITALR ( <sup>13</sup> C <sub>6</sub> , <sup>15</sup> N <sub>4</sub> )  |
| STYXL1     | AFVAQLLEWEK ( <sup>13</sup> C <sub>6</sub> , <sup>15</sup> N <sub>2</sub> )   |
| STYXL1     | LAEPNYLCLLDVR ( <sup>13</sup> C <sub>6</sub> , <sup>15</sup> N <sub>4</sub> ) |
